# Supplementary figures and images for: Piecewise 3D printing of crystallographic data for post-printing construction
Source: Royal Society of Chemistry journal article supplement (doi:10.1039/c9ce00986h), 2019-01-01

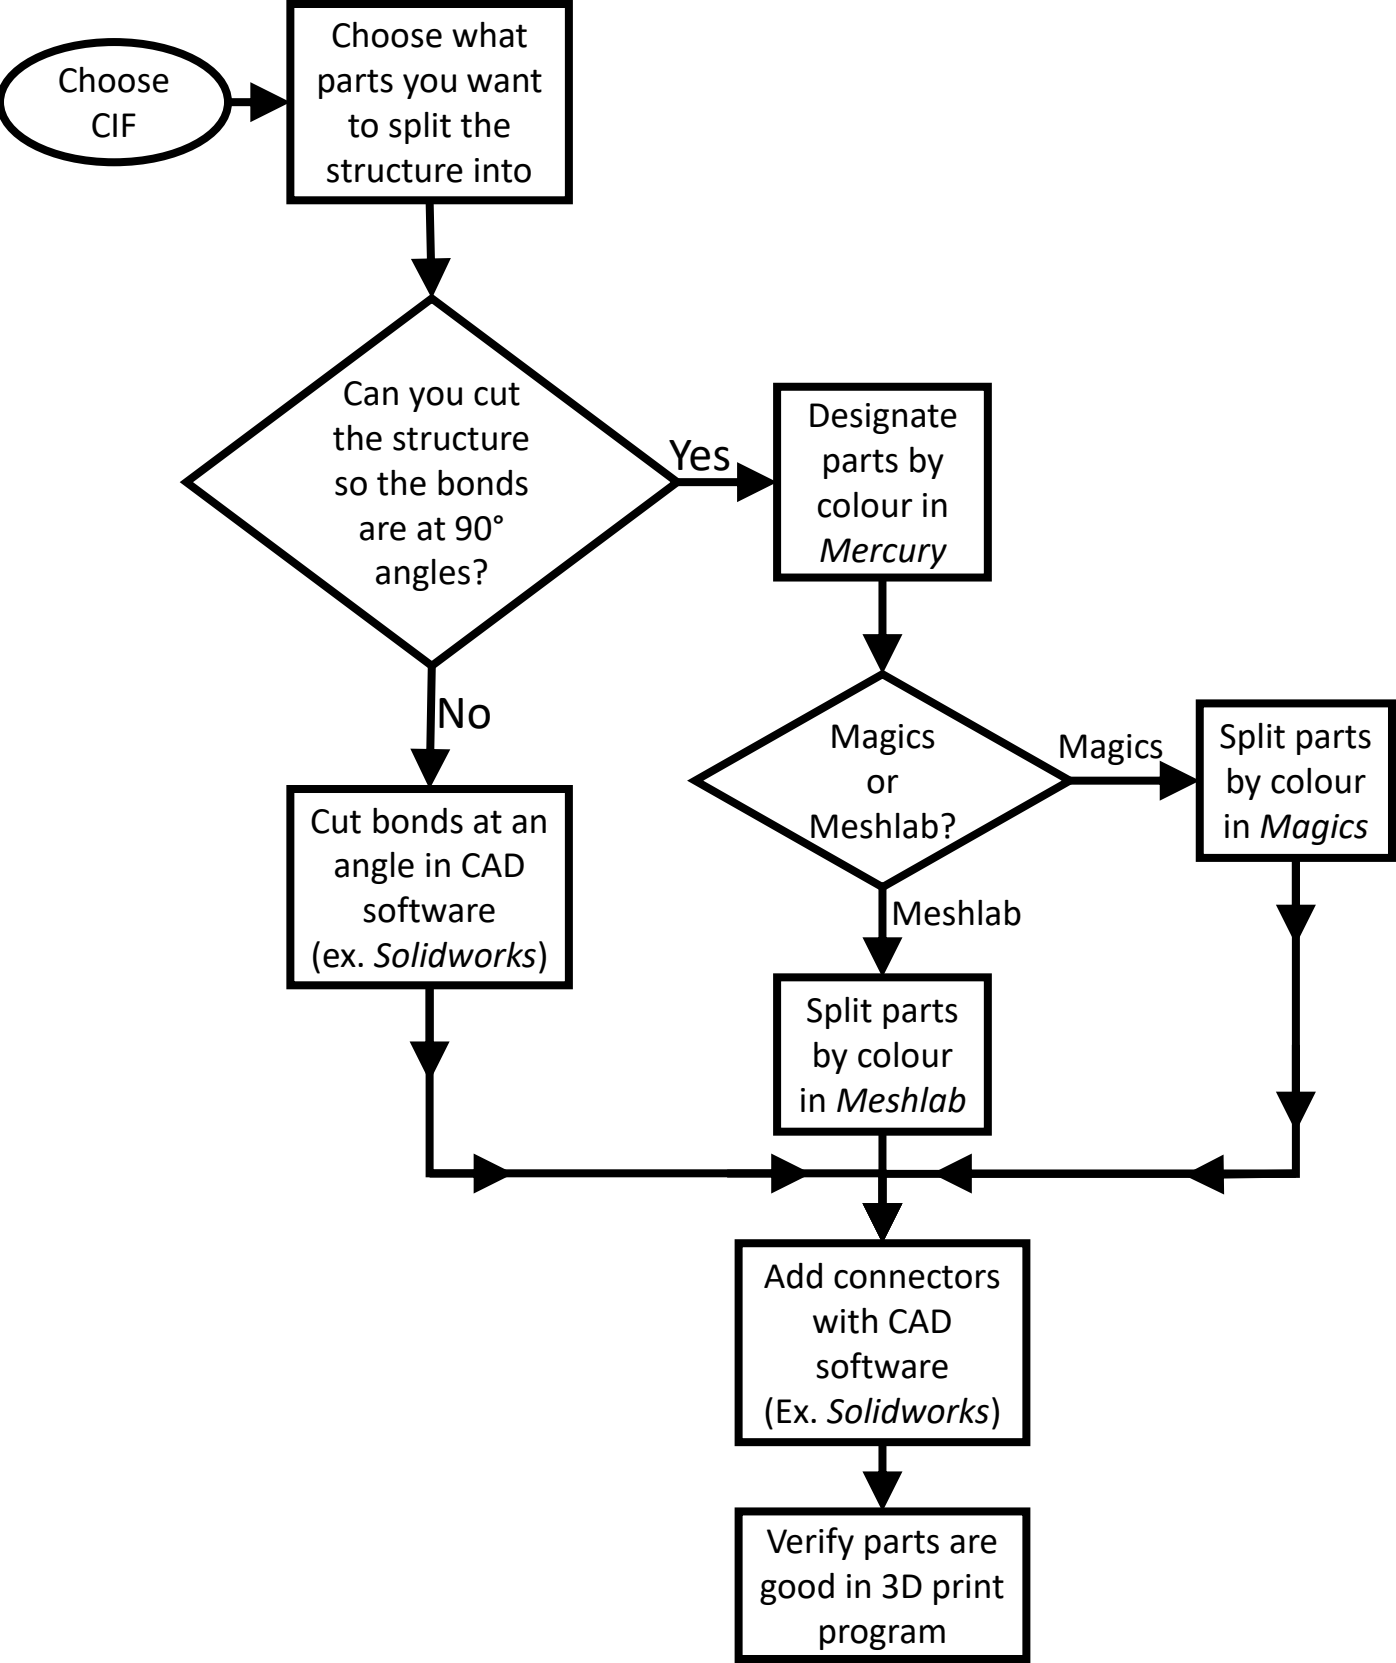

Supplement: c9ce00986h2.zip [file c9ce00986h2.zip]

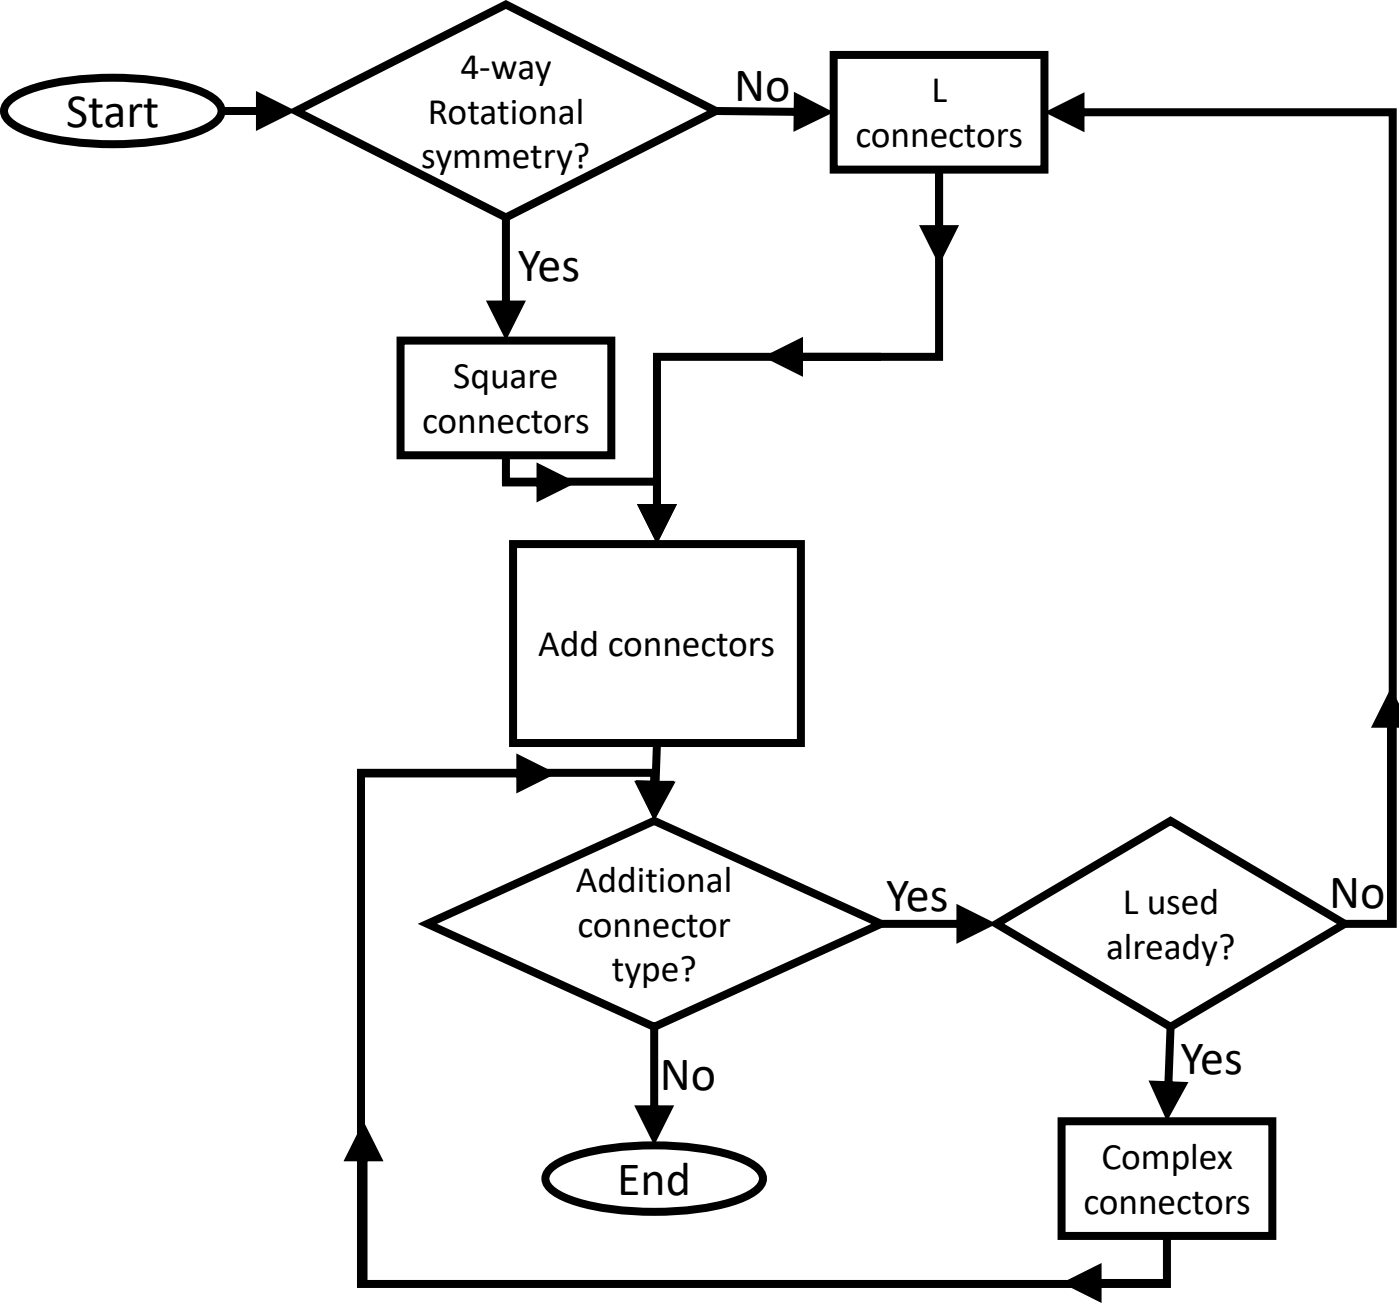

Supplement: c9ce00986h2.zip [file c9ce00986h2.zip]
